# Supplementary material for: Genotype–covariate correlation and interaction disentangled by a whole-genome multivariate reaction norm model
Source: PubMed Central journal article supplement (PMC6527612; doi:10.1038/s41467-019-10128-w), 2019-05-20
Supplement: 41467_2019_10128_MOESM3_ESM.pdf [file 41467_2019_10128_MOESM3_ESM.pdf]

## Description of Additional Supplementary Files

File Name: Supplementary Data 1

Description:

Supplementary Data 1. Estimates of variance components and standard errors based on simulated data under a residual-covariate interaction (RCI) model in the absence of a genotype-covariate interaction.<sup>a</sup>

<sup>a</sup>The simulated phenotypes were generated as  $\mathbf{y} = \boldsymbol{\alpha}_0 + \boldsymbol{\tau}_0 + \boldsymbol{\tau}_1 \times \mathbf{c}$  with  $\mathbf{c} = \boldsymbol{\beta} + \boldsymbol{\varepsilon}$ , all effects drawn from a multivariate normal distribution. The variance-covariance structure of  $\boldsymbol{\alpha}_0$

and  $\boldsymbol{\beta}$  is  $\begin{bmatrix} 1 & 0 \\ 0 & 1 \end{bmatrix}$  and that of  $\boldsymbol{\tau}_0$ ,  $\boldsymbol{\varepsilon}$  and  $\boldsymbol{\tau}_1$  is  $\begin{bmatrix} 1 & 0 & 0.05 \\ 0 & 1 & 0 \\ 0.05 & 0 & \text{var}(\boldsymbol{\tau}_1) \end{bmatrix}$  with  $\text{var}(\boldsymbol{\tau}_1) = 0.25$  in the top

panel and 1 in the bottom panel. The standard error was estimated based on 500 replicates. The results are based on the same data as in Supplementary Figure 7.

File Name: Supplementary Data 2

Description:

Supplementary Data 2. Estimates of variance components and standard errors based on simulated data under a genotype-covariate interaction and residual-covariate interaction model<sup>a</sup>.

<sup>a</sup>The simulated phenotypes were generated as  $\mathbf{y} = \boldsymbol{\alpha}_0 + \boldsymbol{\alpha}_1 \times \mathbf{c} + \boldsymbol{\tau}_0 + \boldsymbol{\tau}_1 \times \mathbf{c}$  with  $\mathbf{c} = \boldsymbol{\beta} + \boldsymbol{\varepsilon}$ , all effects drawn from a multivariate normal distribution. The variance-covariance structure

of  $\boldsymbol{\alpha}_0$ ,  $\boldsymbol{\beta}$ , and  $\boldsymbol{\alpha}_1$  (in this order) is  $\begin{bmatrix} 1 & 0 & 0.05 \\ 0 & 1 & 0 \\ 0.05 & 0 & 0.25 \end{bmatrix}$  and that of  $\boldsymbol{\tau}_0$ ,  $\boldsymbol{\varepsilon}$ , and  $\boldsymbol{\tau}_1$  is

$\begin{bmatrix} 1 & 0 & 0.05 \\ 0 & 1 & 0 \\ 0.05 & 0 & \text{var}(\boldsymbol{\tau}_1) \end{bmatrix}$  with  $\text{var}(\boldsymbol{\tau}_1) = 0.25$  in the top panel and 1 in the bottom panel.

Standard errors were estimated based on 100 replicates. The results are based on the same data as in Supplementary Figure 8.

File Name: Supplementary Data 3

Description:

Supplementary Data 3. Estimates of variance components and standard errors based on simulated data under a genotype-covariate correlation and residual-covariate correlation and interaction model.<sup>a</sup>

<sup>a</sup>The simulated phenotypes were generated as  $\mathbf{y} = \boldsymbol{\alpha}_0 + \boldsymbol{\tau}_0 + \boldsymbol{\tau}_1 \times \mathbf{c}$  with  $\mathbf{c} = \boldsymbol{\beta} + \boldsymbol{\varepsilon}$ , all effects drawn from a multivariate normal distribution. The variance-covariance structure of  $\boldsymbol{\alpha}_0$

and  $\boldsymbol{\beta}$  is  $\begin{bmatrix} 1 & 0.5 \\ 0.5 & 1 \end{bmatrix}$ , and that of  $\boldsymbol{\tau}_0$ ,  $\boldsymbol{\varepsilon}$ , and  $\boldsymbol{\tau}_1$  is  $\begin{bmatrix} 1 & 0.3 & 0.05 \\ 0.3 & 1 & 0 \\ 0.05 & 0 & \text{var}(\boldsymbol{\tau}_1) \end{bmatrix}$  with  $\text{var}(\boldsymbol{\tau}_1) = 0.25$  in

the top panel and 1 in the bottom panel. Standard errors were estimated based on 500 replicates. The results are based on the same data as in Supplementary Figure 9.

File Name: Supplementary Data 4

Description:

Supplementary Data 4. Estimated variance components and standard errors based on simulated data under a genotype-covariate correlation and interaction and residual-covariate correlation and interaction model<sup>a</sup>

The simulated phenotypes were generated as  $\mathbf{y} = \boldsymbol{\alpha}_0 + \boldsymbol{\alpha}_1 \times \mathbf{c} + \boldsymbol{\tau}_0 + \boldsymbol{\tau}_1 \times \mathbf{c}$  with  $\mathbf{c} = \boldsymbol{\beta} + \boldsymbol{\varepsilon}$ , all effects drawn from a multivariate normal distribution. The variance-covariance structure

of  $\boldsymbol{\alpha}_0$ ,  $\boldsymbol{\beta}$ , and  $\boldsymbol{\alpha}_1$  (in this order) is  $\begin{bmatrix} 1 & 0.5 & 0.05 \\ 0.5 & 1 & 0 \\ 0.05 & 0 & 0.25 \end{bmatrix}$  and that of  $\boldsymbol{\tau}_0$ ,  $\boldsymbol{\varepsilon}$ , and  $\boldsymbol{\tau}_1$  is

$\begin{bmatrix} 1 & 0.3 & 0.05 \\ 0.3 & 1 & 0 \\ 0.05 & 0 & \text{var}(\boldsymbol{\tau}_1) \end{bmatrix}$  with  $\text{var}(\boldsymbol{\tau}_1) = 0.25$  in the top panel and 1 in the bottom panel.

Standard errors were estimated based on 100 replicates. The results are based on the same data as in Supplementary Figure 10.

File Name: Supplementary Data 5

Description:

Supplementary Data 5. Estimated variance components and standard errors based on simulated data under a genotype-covariate correlation and interaction and residual-covariate correlation and interaction model

The simulated phenotypes were generated as  $\mathbf{y} = \boldsymbol{\alpha}_0 + \boldsymbol{\alpha}_1 \times \mathbf{c} + \boldsymbol{\tau}_0 + \boldsymbol{\tau}_1 \times \mathbf{c}$  with  $\mathbf{c} = \boldsymbol{\beta} + \boldsymbol{\varepsilon}$ , all effects drawn from a multivariate normal distribution. The variance-covariance structure

of  $\boldsymbol{\alpha}_0$ ,  $\boldsymbol{\beta}$ , and  $\boldsymbol{\alpha}_1$  (in this order) is  $\begin{bmatrix} 1 & 0.5 & 0.05 \\ 0.5 & 1 & 0 \\ 0.05 & 0 & 1 \end{bmatrix}$  and that of  $\boldsymbol{\tau}_0$ ,  $\boldsymbol{\varepsilon}$ , and  $\boldsymbol{\tau}_1$  is

$\begin{bmatrix} 1 & 0.3 & 0.05 \\ 0.3 & 1 & 0 \\ 0.05 & 0 & \text{var}(\boldsymbol{\tau}_1) \end{bmatrix}$  with  $\text{var}(\boldsymbol{\tau}_1) = 0.25$  in the top panel and 1 in the bottom panel.

Standard errors were estimated based on 100 replicates. The results are based on the same data as in Supplementary Figure 11.

File Name: Supplementary Data 6

Description:

Supplementary Data 6. Estimated variance components and standard errors of BMI when fitting SMK, NEU or PC1 as a covariate of interest using RR-GREML, GCI-GREML, RNM and MRNM.

File Name: Supplementary Data 7

Description:

Supplementary Data 7. Estimated variance components and standard errors of BMI when fitting SMK, NEU or PC1 as a covariate of interest based on the analysis of each individual study and the meta-analyses across the first and second groups (g1 and g2) within UKBB1.

File Name: Supplementary Data 8

Description:

Supplementary Data 8. Estimated variance components and standard errors of BMI when fitting SMK, NEU or PC1 as a covariate of interest based on the analysis of each individual study and the meta-analyses across UKBB1 and UKBB2.

File Name: Supplementary Data 9

Description:

Supplementary Data 9. Estimated variance components when fixed effects have large main effects

One hundred replicates of data were simulated under each of two scenarios that assumed no genotype-covariate interaction but a residual-covariate interaction of different magnitudes. Simulation was based QCed ARIC data consisting of 7,263 individuals and 583,058 SNPs. The models were specified as  $\mathbf{y} = \mathbf{b} \times \mathbf{c} + \boldsymbol{\alpha}_0 + \boldsymbol{\alpha}_1 \times \mathbf{c} + \boldsymbol{\tau}_0$  with  $\mathbf{c} = \boldsymbol{\beta} + \boldsymbol{\varepsilon}$ , all effects drawn from a multivariate normal distribution, where  $\mathbf{b}$  was the regression coefficient of the fixed effects with a value of 0.1 or 0.5, the variance-covariance structure

between  $\boldsymbol{\alpha}_0$ ,  $\boldsymbol{\beta}$ , and  $\boldsymbol{\alpha}_1$  (in this order) was 
$$\begin{bmatrix} 1 & \text{cov}(\boldsymbol{\alpha}_0, \boldsymbol{\beta}) & 0 \\ \text{cov}(\boldsymbol{\alpha}_0, \boldsymbol{\beta}) & 1 & 0 \\ 0 & 0 & \text{var}(\boldsymbol{\alpha}_1) \end{bmatrix}$$
 with

$\text{cov}(\boldsymbol{\alpha}_0, \boldsymbol{\beta}) = 0$  or  $0.5$ ,  $\text{var}(\boldsymbol{\alpha}_1) = 0$  or  $0.25$  and that between  $\boldsymbol{\tau}_0, \boldsymbol{\varepsilon}$  was  $\begin{bmatrix} 1 & 0 \\ 0 & 1 \end{bmatrix}$ . For every replicate, MRNM G-C and MRNM Full models were applied to raw phenotypes ( $\mathbf{y}$ ) or phenotypes adjusted for the covariate ( $\mathbf{c}$ ).
